# Supplementary material for: Development of a Reporter System for In Vivo Monitoring of γ-Secretase Activity in Drosophila
Source: PubMed Central journal article supplement — Mol Cells. 2017 Jan 26;40(1):73–81. doi: 10.14348/molcells.2017.2294 (PMC5303891; doi:10.14348/molcells.2017.2294), 2017-01-26

## **Supplemental Materials**

### **Development of a Reporter System for *In Vivo* Monitoring of $\gamma$ -Secretase Activity in *Drosophila***

Young Gi Hong, Seyun Roh, Donggi Paik, and Sangyun Jeong

**Fig. S1. Phenotypic characterization of wing vein truncations**

(A) Length comparison of L3, L4, and L5 veins in wild-type wing. The average L4 to L3 vein length ratio ( $=b/a$ ) was  $0.97\pm 0.0036$  ( $n=23$ ). The average L5 to L3 vein length ratio ( $=c/a$ ) was  $0.58\pm 0.0056$  ( $n=23$ ).

(B) The average percentages of L4 and L5 vein truncations were calculated by the following equations:

$$\text{L4 vein truncation} = [(0.97x-y)/(0.97x)] \times 100 (\%)$$

$$\text{L5 vein truncation} = [(0.58x-z)/(0.58x)] \times 100 (\%)$$

**Fig. S2. Genetic interactions among  $N^{TM}$ - $SV^{42m}$ , *Notch*, and *presenilin* alleles**

(A) Females heterozygous for e16E-Gal4 show a normal pattern of five longitudinal veins. Scale bar indicates 50  $\mu\text{m}$ .

(B) Overexpression of  $N^{TM}$ - $SV^{42m}$  in the posterior compartment leads to moderate vein truncation (arrows).

(C) In females heterozygous for  $N^{Ax-E2}$ , the wing shows mild truncation only in L5 vein (arrow).

(D) One copy of  $N^{Ax-E2}$  mutation slightly enhances the GOF phenotype of  $N^{TM}$ - $SV^{42m}$  (arrows).

(E) Overexpression of *psn RNAi* in the posterior compartment results in vein thickening (square brackets).

(F) Overexpression of *psn RNAi* completely suppresses the GOF of  $N^{TM}$ - $SV^{42m}$ . Square brackets indicate the vein thickening phenotype.

(G) Percentages of wing vein truncations in females with indicated genotypes (\*\* $p < 0.001$ ,  $t$  test). Error bars indicate S.E.M. by  $t$  test.  $n$  = number of wings scored for each genotype.

**Fig. S3. Genetic interactions among *APPL-SV<sup>82m</sup>*, *Notch*, and *presenilin* alleles**

(A) Females heterozygous for e16E-Gal4 show a normal pattern of five longitudinal veins. Scale bar indicates 50  $\mu\text{m}$ .

(B) Overexpression of *APPL-SV<sup>82m</sup>* in the posterior compartment causes severe vein truncation (arrows). Asterisks indicate a false vein.

(C) In females heterozygous for *N<sup>Ax-E2</sup>*, the wing shows mild truncation only in L5 vein (arrow).

(D) One copy of *N<sup>Ax-E2</sup>* mutation hardly enhances the L4 vein GOF phenotype of *APPL-SV<sup>85m</sup>* (arrows). Asterisks indicate a false vein.

(E) Overexpression of *psn RNAi* in the posterior compartment results in vein thickening (square brackets).

(F) Overexpression of *psn RNAi* in part suppresses the GOF vein phenotype of *APPL-SV<sup>85m</sup>* (arrows).

(G) Percentages of wing vein truncations in females with indicated genotypes ( $\dagger p > 0.3$  and \*\* $p < 0.001$ ,  $t$  test). Error bars indicate S.E.M. by  $t$  test.  $n$  = number of wings scored for each genotype.

**Fig. S4. Genetic interactions among *p35*, *N<sup>TM</sup>-SV<sup>42m</sup>*, and *APPL-SV<sup>82m</sup>***

(A) Females heterozygous for e16E-Gal4 show a normal pattern of five longitudinal veins. Scale bar indicates 50  $\mu$ m.

(B) Overexpression of *N<sup>TM</sup>-SV<sup>42m</sup>* in the posterior compartment results in moderate vein truncation (arrows). Asterisks indicate a false vein.

(C) Overexpression of *APPL-SV<sup>82m</sup>* in the posterior compartment causes severe vein truncation (arrows).

(D) Overexpression of *p35* in the posterior compartment results in slight vein truncation (arrow).

(E) Coexpression of *p35* in the posterior compartment slightly increases the GOF vein phenotype of *N<sup>TM</sup>-SV<sup>42m</sup>* (arrows).

(F) Coexpression of *p35* in the posterior compartment significantly decreases the L4 vein GOF phenotype of *APPL-SV<sup>85m</sup>* (arrows).

(G) Percentages of wing vein truncations in females with indicated genotypes (\* $p < 0.05$ , \*\*\* $p < 0.001$ , and †not applicable, *t* test). Error bars indicate S.E.M. by *t* test. n = number of wings scored for each genotype.

Figure S1

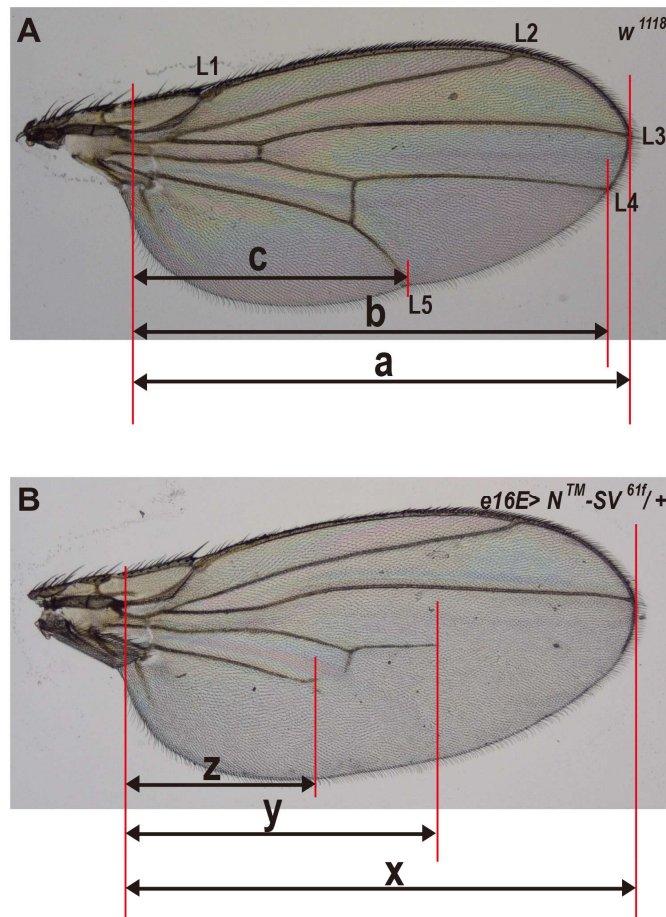

Figure S2

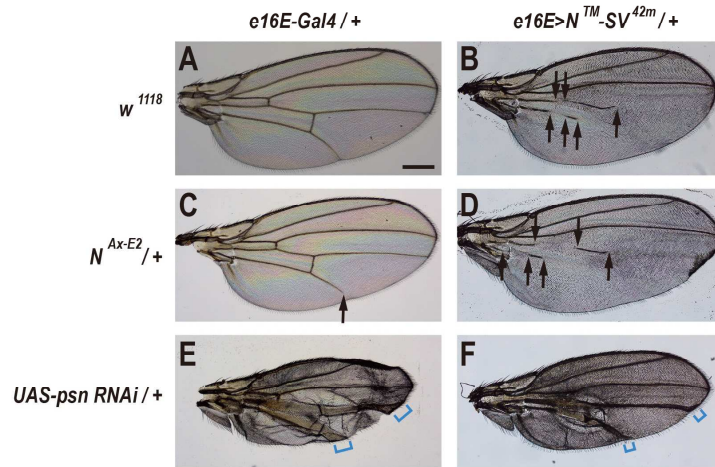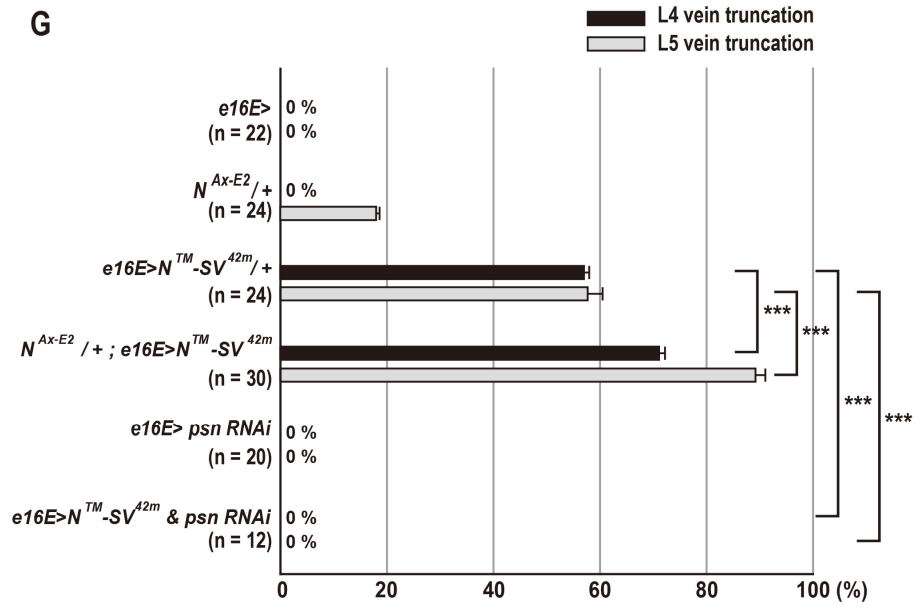

Figure S3

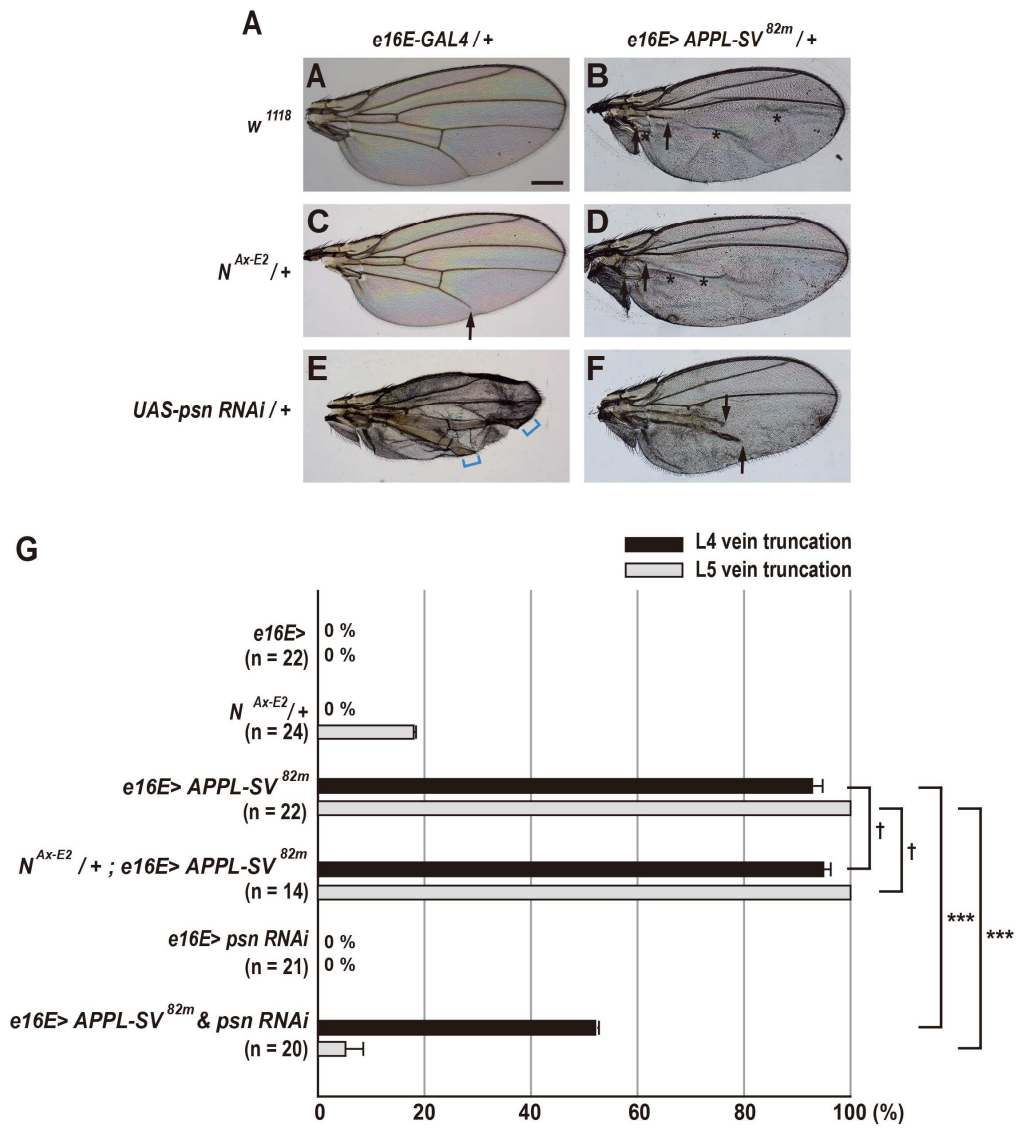

Figure S4

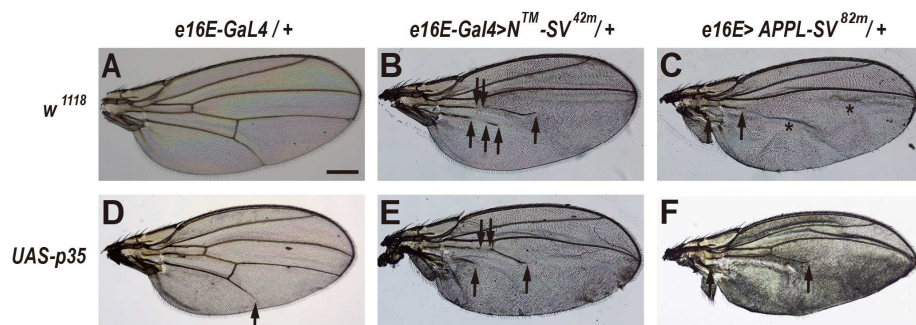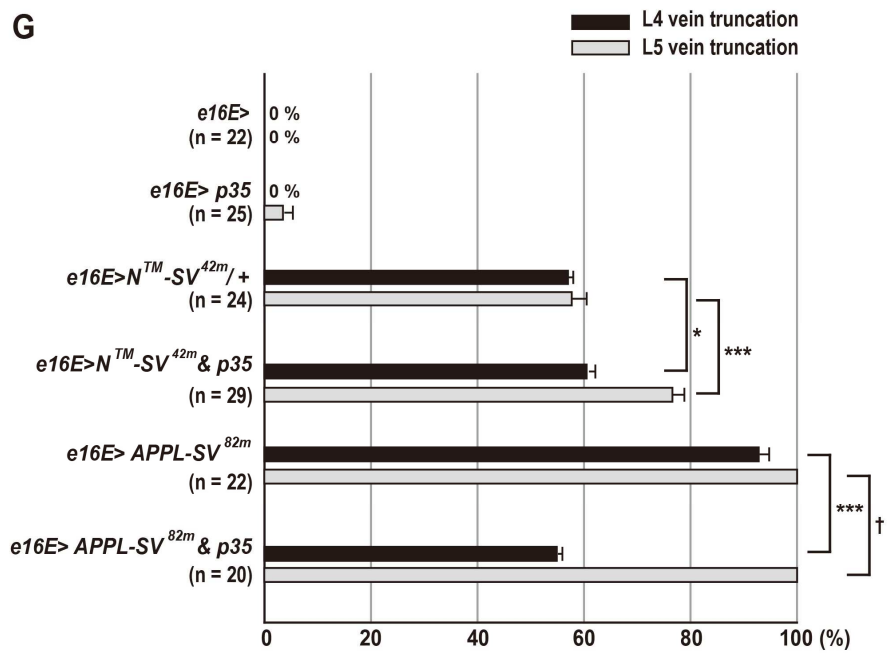

Supplement: molce-40-1-73-supple.pdf [file molce-40-1-73-supple.pdf]
